# Supplementary material for: Modifying the electronic and magnetic properties of the scandium nitride semiconductor monolayer via vacancies and doping
Source: Royal Society of Chemistry journal article supplement (doi:10.1039/d3cp04977a), 2023-12-13
Supplement: d3cp04977a1.pdf [file d3cp04977a1.pdf]

## Modifying the Electronic and Magnetic Properties of Scandium Nitride Semiconductor Monolayer via Vacancy and Doping

Vo Van On,<sup>1</sup> J. Guerrero-Sanchez,<sup>2</sup> and D. M. Hoat<sup>3,4,\*</sup>

<sup>1</sup>Center for Forecasting Study, Institute of Southeast Vietnamese Studies, Thu Dau Mot University, Binh Duong Province, Viet Nam

<sup>2</sup>Universidad Nacional Autónoma de México, Centro de Nanociencias y Nanotecnología, Apartado Postal 14, Ensenada, Baja California, Código Postal 22800, Mexico

<sup>3</sup>Institute of Theoretical and Applied Research, Duy Tan University, Ha Noi 100000, Viet Nam

<sup>4</sup>Faculty of Natural Sciences, Duy Tan University, Da Nang 550000, Viet Nam

\*Corresponding author: [dominhhoat@duytan.edu.vn](mailto:dominhhoat@duytan.edu.vn)

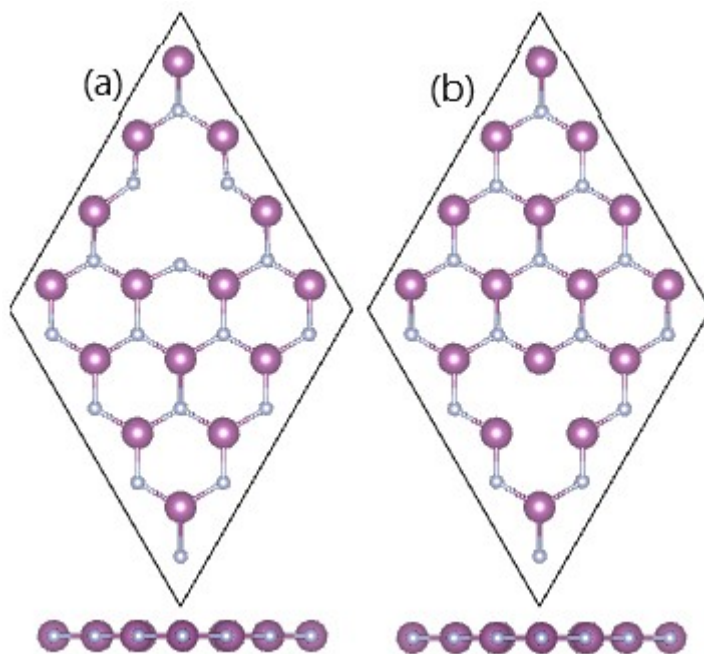

Figure S1: Relaxed atomic structure of ScN monolayer with (a) Single Sc vacancy and (b) Single N vacancy.

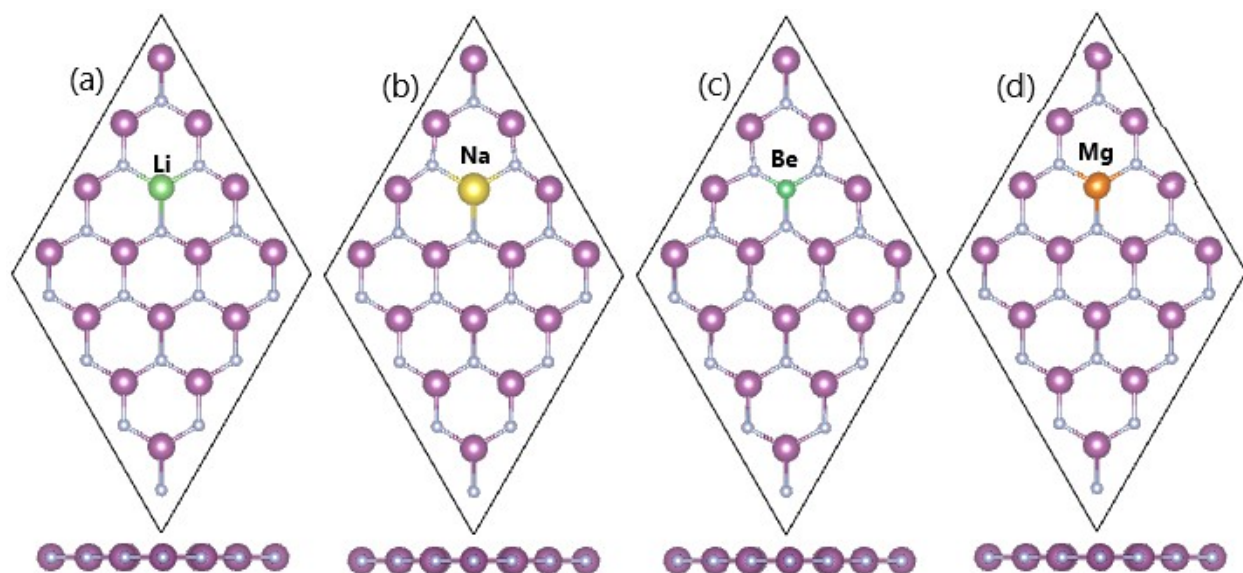

Figure S2: Relaxed atomic structure of (a) Li-, (b) Na-, (c) Be-, and (d) Mg-doped ScN monolayer.

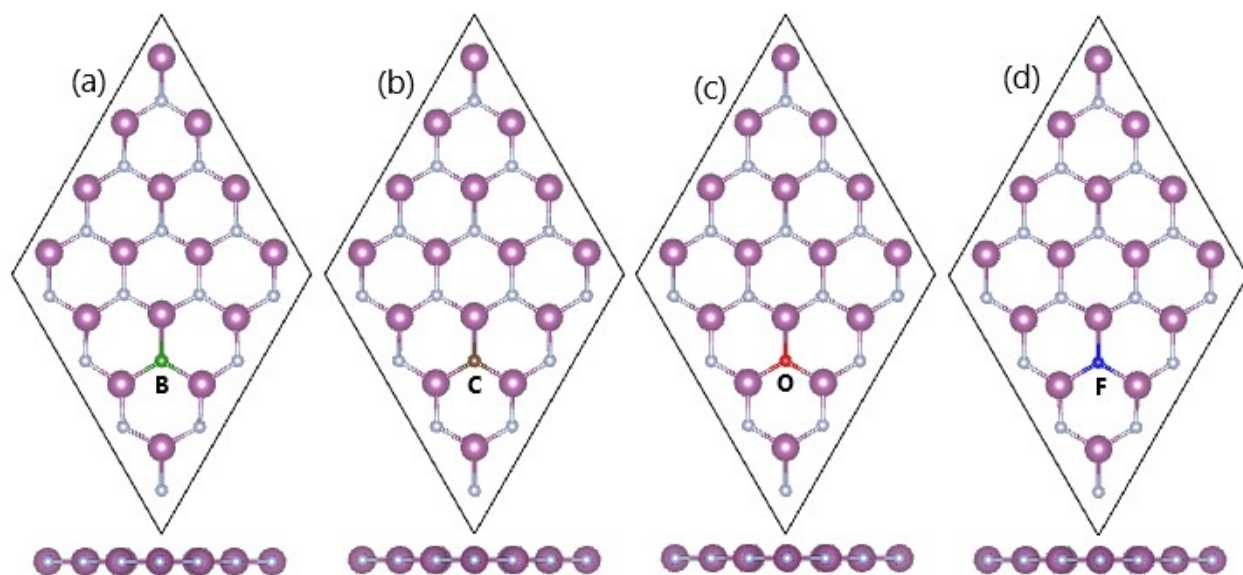

Figure S3: Relaxed atomic structure of (a) B-, (b) C-, (c) O-, and (d) F-doped ScN monolayer.

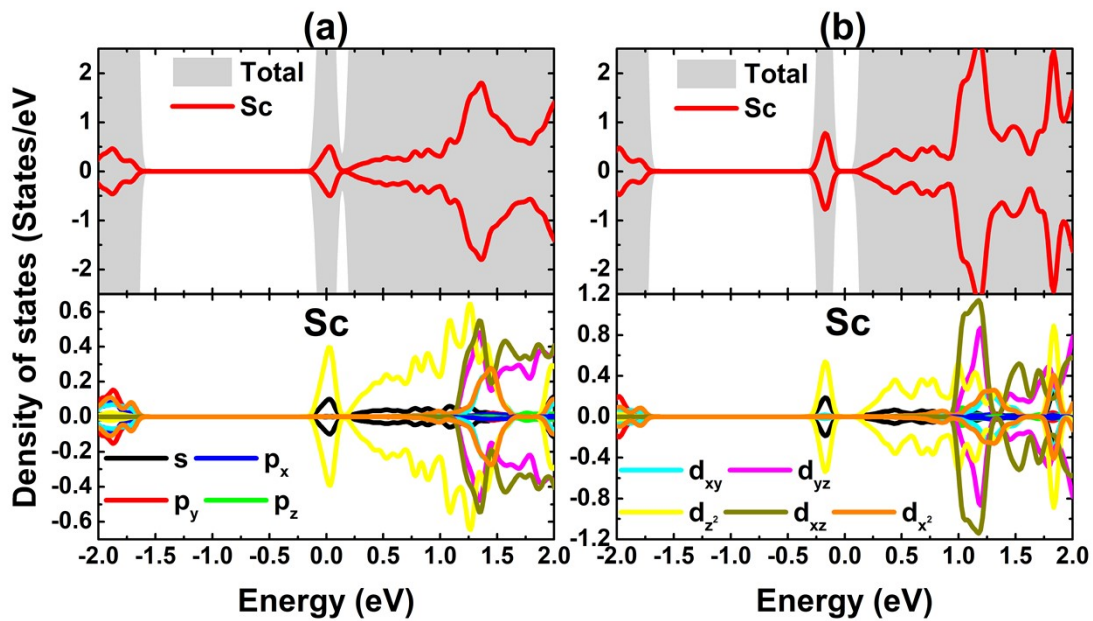

Figure S4: Total and projected density states of Sc atom closest to doping site of (a) O- and (b) F-doped ScN monolayer.

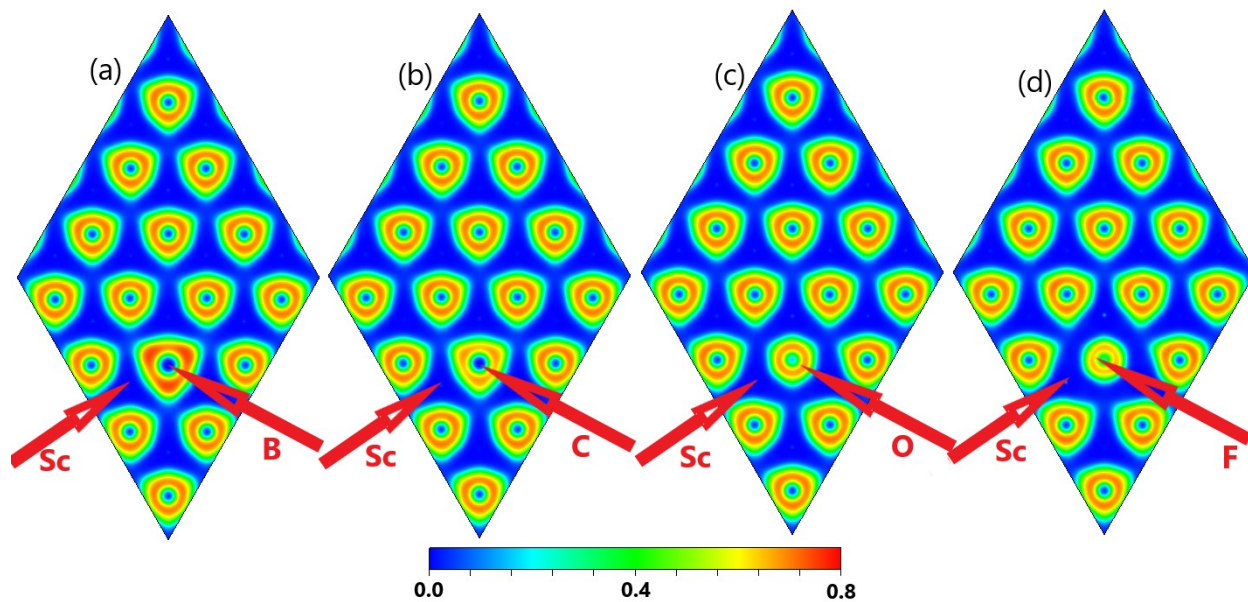

Figure S5: Electron localization function in (a) B-, (b) C-, (c) O-, and (d) F-doped ScN monolayer.

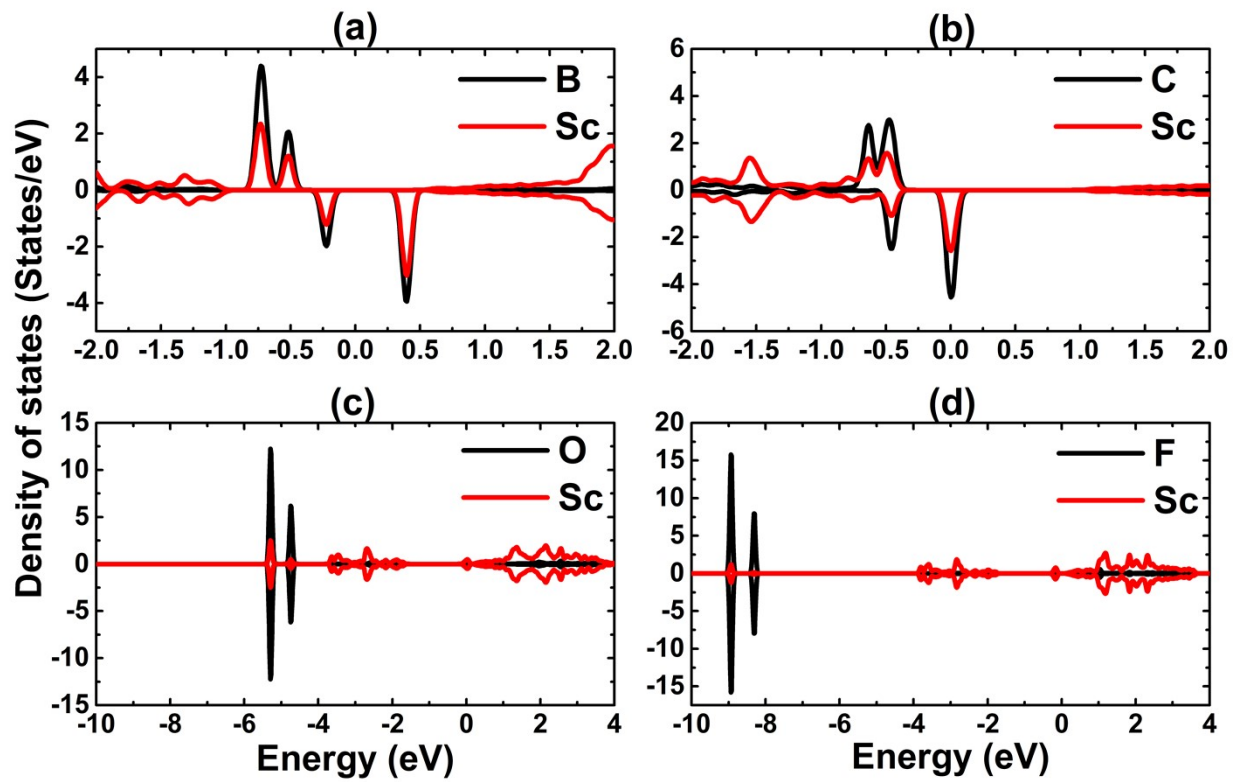

Figure S6: Atom-decomposed density of states of impurity and its neighbor Sc atom in (a) B-, (b) C-, (c) O-, and (d) F-doped ScN monolayer.
